# Supplementary material for: A multi-batch design to deliver robust estimates of efficacy and reduce animal use – a syngeneic tumour case study
Source: PubMed Central journal article supplement (PMC7148295; doi:10.1038/s41598-020-62509-7), 2020-04-10
Supplement: 41598_2020_62509_MOESM1_ESM.pdf [file 41598_2020_62509_MOESM1_ESM.pdf]

# **A multi-batch design to deliver robust estimates of efficacy and reduce animal use – a syngeneic tumour case study**

Natasha A. Karp<sup>1\*</sup>, Zena Wilson<sup>2</sup>, Eve Stalker<sup>2,3</sup>, Lorraine Mooney<sup>2,4</sup>, Stanley E. Lazic<sup>1,5</sup>, Bairu Zhang<sup>1</sup>, Elizabeth Hardaker<sup>6</sup>

1: Data Sciences & Quantitative Biology, Discovery Sciences, R&D, AstraZeneca, Cambridge, UK

2: Early Oncology TDE, R&D Oncology, AstraZeneca, Alderley Park, UK

3: Current address: Precision Medicine, R&D Oncology, AstraZeneca, Cambridge, UK

4: Current address: Preclinical Science Services, Alderley park Limited, Macclesfield, UK

5: Current address: Prioris.ai Inc. Ottawa ON, Canada

6: Early TDE Discovery, R&D Oncology, AstraZeneca, Cambridge, UK

Corresponding author\*: Natasha A. Karp

**Supplementary Figure 1: Bland Altman plot comparing the estimated treatment effect between the different analytical techniques.**

**a:** Fixed effect model versus random effect model. **b:** Meta-Analysis versus random effect model. **c:** Pooled approach versus random effect model. Experimental data was constructed to consist of 3 independent batches with a control and treated arm with five animals per group per batch and where the treatment lead to a consistent 30% reduction in growth rate. The growth rate characteristics were based on the characteristics of a MC38 experiment (mean: 0.105, standard deviation: 0.026). Batch variation was assumed to be normally distributed with a mean of 0 and variance 20% of the baseline growth rate characteristics. This experimental data was then processed by the various analytical techniques. To explore variation in the outcome this process was repeated 300 times.

**a.**

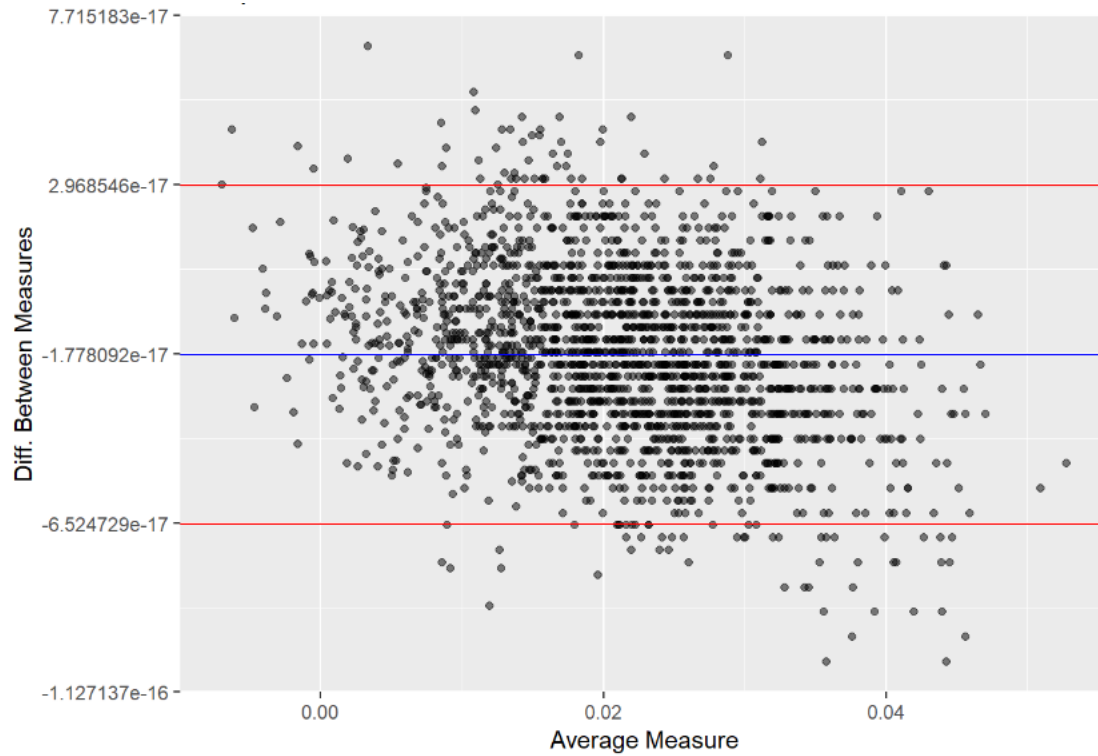

**b.**

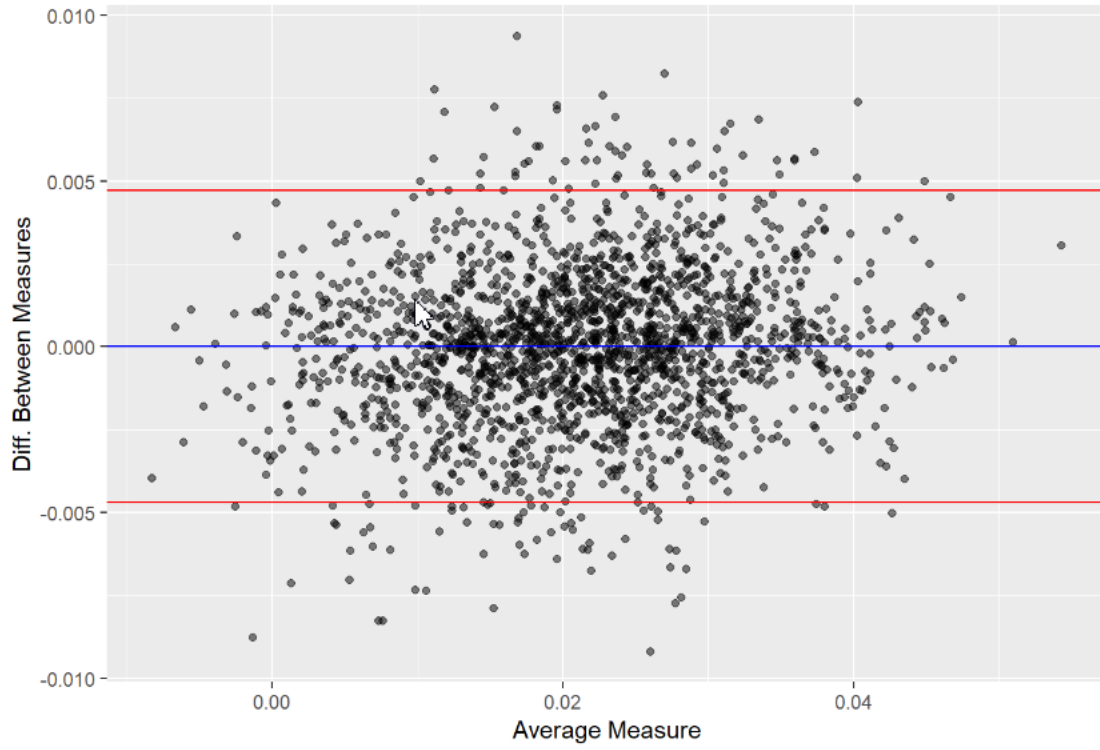

**c.**

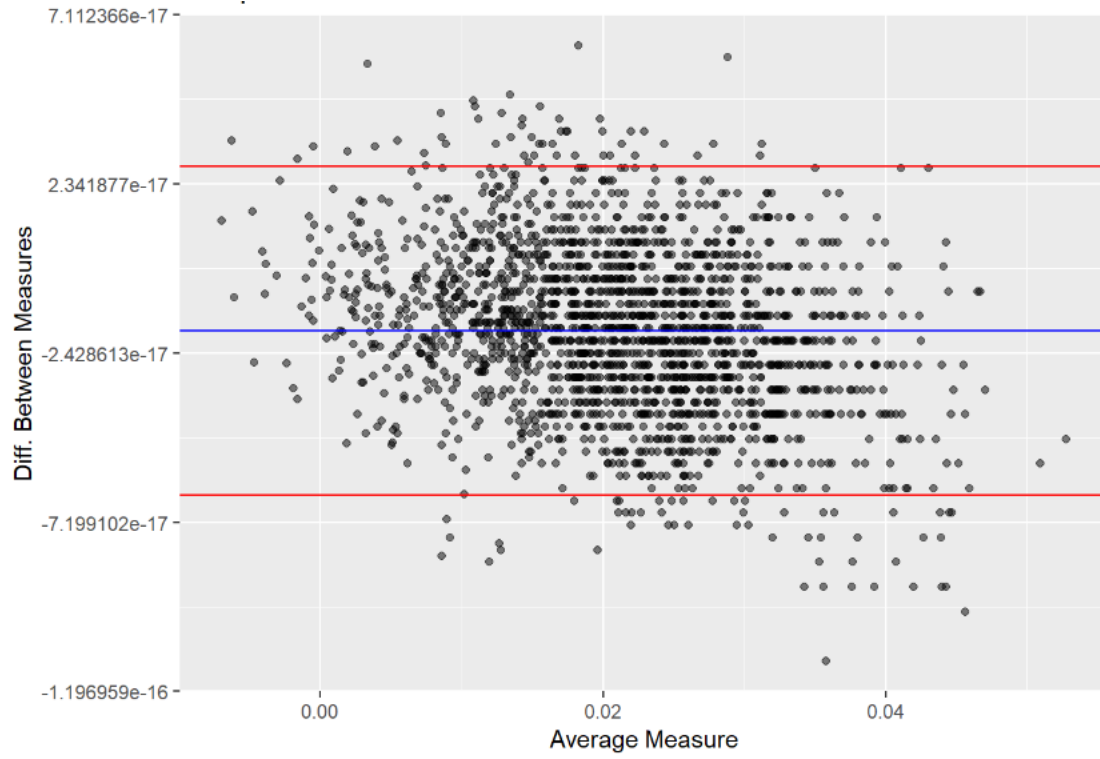

**Supplementary Figure 2:** Exploration of the variability in the growth rate mean and variance seen.

**a:** The variation in the growth rate for each animal in the CT26WT vehicle group. **b:** The variation in the growth rate for each animal in the MC38 vehicle group. **c:** The variation in the growth rate for each animal in the 4T1 vehicle group. The n per study varied between 8 and 15 animals. A boxplot provides 5 summary measures: minimum, first quartile value, mean, third quartile value and maximum. Outliers are shown as individual data points if they are beyond the first/third quartile  $\pm 1.5 \times$  interquartile range. The red dotted line indicates the median growth rate across the experiments.

**a.**

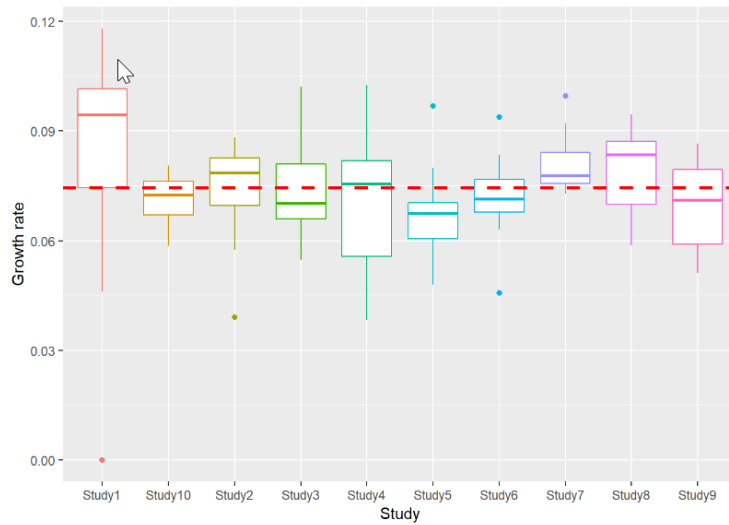

**b.**

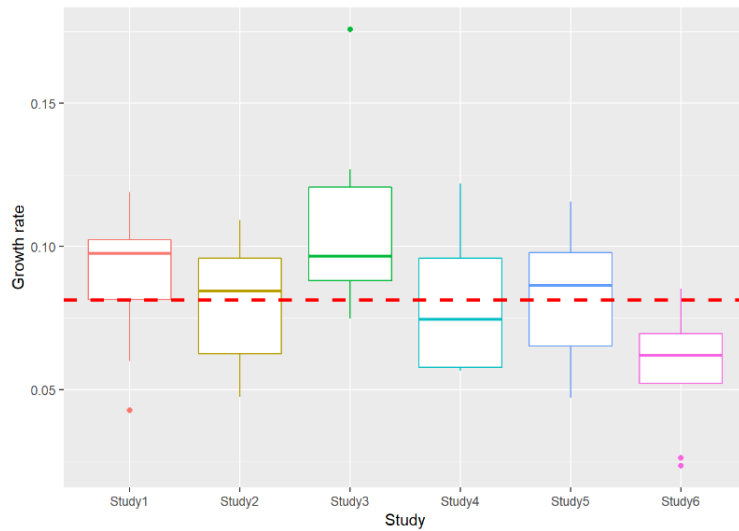

**C.**

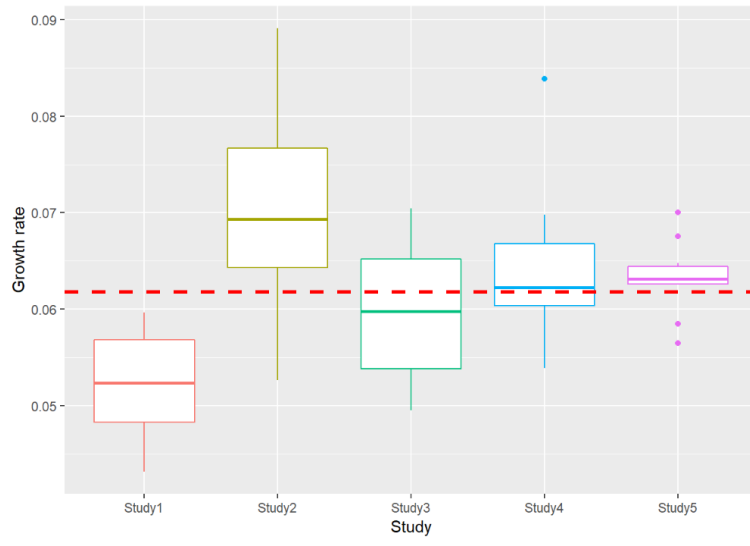

**Supplementary Figure 3:** Simulations to estimate the power for a classic one batch design for variety of models.

In these simulations, experimental data was constructed to consist of a single batch with a control and treated arm with a 30% growth rate inhibition. The number of animals per group was varied. The growth rate characteristics were the average growth rate for a line and a standard deviation value that encompasses 75% of the values seen. The experimental data generated was processed by a regression model with treatment as a fixed effect using a 5% significance threshold. For each scenario, the FNR was estimated by running 2000 simulations. To assess variation in the FNR, the simulation process was repeated three times for each scenario explored.

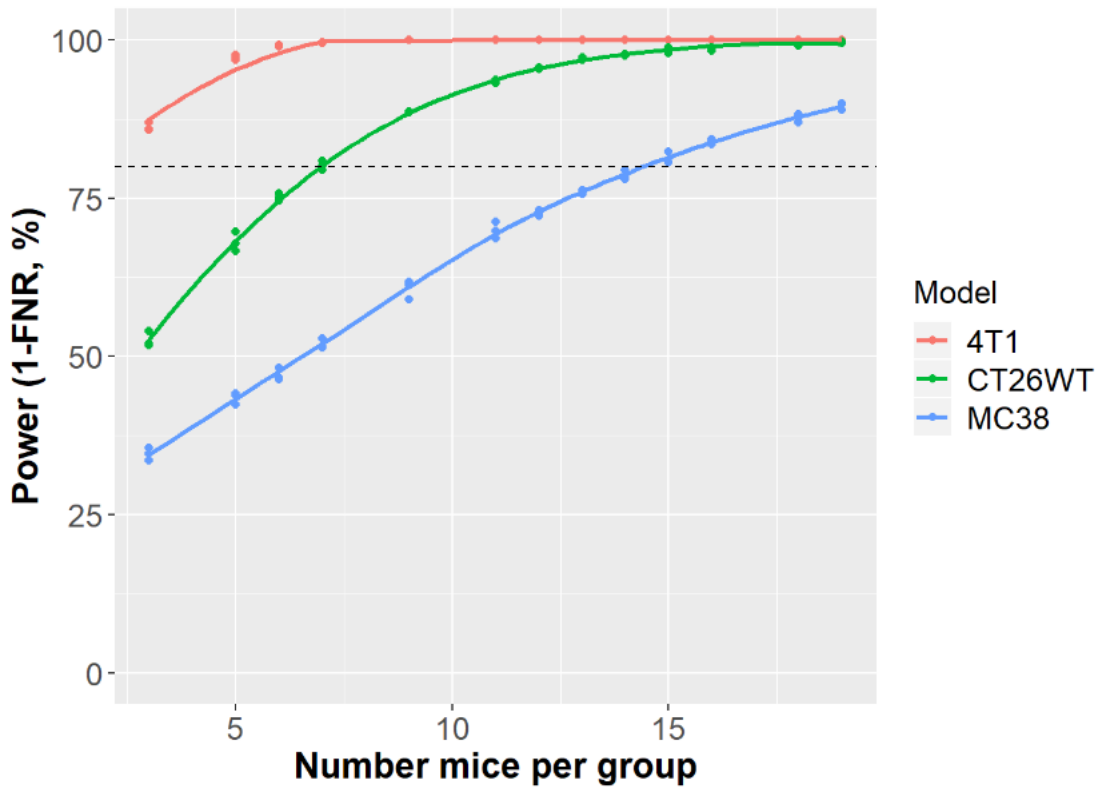

**Supplementary Table 1: Multi-batch CT26AZ case study 1 estimated effect and test of significance**

| <b>Compound</b> | <b>Method</b> | <b>Estimate</b> | <b>SE</b> | <b>P value</b> |
|-----------------|---------------|-----------------|-----------|----------------|
| DrugA           | Fixed         | 0.0638          | 0.0043    | 1.8e-16        |
|                 | Random        | 0.0640          | 0.0102    | 3.69e-10       |
|                 | Meta-analysis | 0.0661          | 0.0103    | 1.45e-10       |
| DrugB           | Fixed         | 0.0260          | 0.0045    | 1.32e-6        |
|                 | Random        | 0.0260          | 0.0067    | 9.83e-5        |
|                 | Meta-analysis | 0.0234          | 0.0053    | 1.09e-5        |
| DrugAandB       | Fixed         | 0.0635          | 0.0070    | 4.51e-12       |
|                 | Random        | 0.0635          | 0.0069    | 3.35e-20       |
|                 | Meta-analysis | 0.0708          | 0.0059    | 5.27e-33       |

**Supplementary Table 2: Multi-batch CT26WT case study 2 estimated effect and test of significance**

| <b>Compound</b> | <b>Method</b> | <b>Estimate</b> | <b>SE</b> | <b>P value</b> |
|-----------------|---------------|-----------------|-----------|----------------|
| DrugA           | Fixed         | 0.0233          | 0.0111    | 4.34e-2        |
|                 | Random        | 0.0222          | 0.0108    | 4.02e-2        |
|                 | Meta-analysis | 0.0224          | 0.0092    | 1.48e-2        |
| DrugB           | Fixed         | 0.0419          | 0.0112    | 8.05e-4        |
|                 | Random        | 0.0417          | 0.0108    | 1.12e-4        |
|                 | Meta-analysis | 0.0412          | 0.0099    | 2.90e-5        |
| DrugAandB       | Fixed         | 0.0396          | 0.0136    | 6.68e-3        |
|                 | Random        | 0.0393          | 0.0131    | 2.72e-3        |
|                 | Meta-analysis | 0.0382          | 0.0115    | 9.27e-4        |
